# Supplementary material for: Comparison of Rhythm and Rate Control Strategies for Stroke Occurrence in a Prospective Cohort of Atrial Fibrillation Patients
Source: PubMed Central journal article supplement — Yonsei Med J. 2017 Feb 5;59(2):258–64. doi: 10.3349/ymj.2018.59.2.258 (PMC5823828; doi:10.3349/ymj.2018.59.2.258), 2017-02-05
Supplement: ymj-59-258-s002.pdf [file ymj-59-258-s002.pdf]

**Supplementary Table 1.** Comparison of Anticoagulants in the Rhythm and the Rate Control Strategy Groups according to CHA<sub>2</sub>DS<sub>2</sub>-VASc Score

|                                                    | All (n=2508) | Rhythm control (n=1134) | Rate control (n=1374) | p value |
|----------------------------------------------------|--------------|-------------------------|-----------------------|---------|
| CHA <sub>2</sub> DS <sub>2</sub> -VAsC 1, n (%)    | n=378        | n=214                   | n=164                 |         |
| Warfarin                                           | 75 (19.8)    | 43 (20.1)               | 32 (19.5)             | 0.888   |
| Dabigatran                                         | 21 (5.6)     | 11 (5.1)                | 10 (6.1)              | 0.687   |
| Apixaban                                           | 22 (5.8)     | 13 (6.1)                | 9 (5.5)               | 0.809   |
| Ribaroxaban                                        | 18 (4.8)     | 13 (6.1)                | 5 (3.0)               | 0.171   |
| Edoxaban                                           | 4 (1.1)      | 3 (1.4)                 | 1 (0.6)               | 0.456   |
| CHA <sub>2</sub> DS <sub>2</sub> -VAsC 2, n (%)    | n=531        | n=261                   | n=270                 |         |
| Warfarin                                           | 77 (14.5)    | 40 (14.8)               | 37 (14.2)             | 0.835   |
| Dabigatran                                         | 107 (20.2)   | 60 (22.2)               | 47 (18.0)             | 0.235   |
| Apixaban                                           | 122 (23.0)   | 60 (22.2)               | 62 (23.8)             | 0.675   |
| Ribaroxaban                                        | 95 (17.9)    | 41 (15.2)               | 54 (20.7)             | 0.981   |
| Edoxaban                                           | 25 (4.7)     | 7 (2.6)                 | 18 (6.9)              | 0.113   |
| CHA <sub>2</sub> DS <sub>2</sub> -VAsC 3, n (%)    | n=610        | n=271                   | n=339                 |         |
| Warfarin                                           | 92 (15.1)    | 38 (14.0)               | 54 (15.9)             | 0.570   |
| Dabigatran                                         | 117 (19.2)   | 55 (20.3)               | 62 (18.3)             | 0.537   |
| Apixaban                                           | 116 (27.2)   | 83 (30.6)               | 83 (24.5)             | 0.100   |
| Ribaroxaban                                        | 133 (21.8)   | 60 (22.1)               | 73 (21.5)             | 0.921   |
| Edoxaban                                           | 29 (4.8)     | 13 (4.8)                | 16 (4.7)              | 0.989   |
| CHA <sub>2</sub> DS <sub>2</sub> -VAsC 4, n (%)    | n=375        | n=132                   | n=243                 |         |
| Warfarin                                           | 71 (18.9)    | 23 (17.4)               | 48 (19.8)             | 0.679   |
| Dabigatran                                         | 64 (17.1)    | 24 (18.2)               | 40 (16.5)             | 0.669   |
| Apixaban                                           | 120 (32.0)   | 48 (36.4)               | 72 (29.6)             | 0.203   |
| Ribaroxaban                                        | 74 (19.7)    | 24 (18.2)               | 50 (20.6)             | 0.684   |
| Edoxaban                                           | 17 (4.5)     | 5 (3.8)                 | 12 (4.9)              | 0.796   |
| CHA <sub>2</sub> DS <sub>2</sub> -VAsC 5, n (%)    | n=255        | n=86                    | n=169                 |         |
| Warfarin                                           | 55 (21.6)    | 13 (15.1)               | 42 (24.9)             | 0.079   |
| Dabigatran                                         | 38 (14.9)    | 20 (23.3)               | 18 (10.7)             | 0.013*  |
| Apixaban                                           | 88 (34.5)    | 28 (32.6)               | 60 (35.5)             | 0.578   |
| Ribaroxaban                                        | 55 (21.6)    | 16 (18.6)               | 39 (23.1)             | 0.530   |
| Edoxaban                                           | 5 (2.0)      | 3 (3.5)                 | 2 (1.2)               | 0.339   |
| CHA <sub>2</sub> DS <sub>2</sub> -VAsC 6–10, n (%) | n=157        | n=34                    | n=123                 |         |
| Warfarin                                           | 38 (24.1)    | 11 (32.4)               | 27 (22.2)             | 0.258   |
| Dabigatran                                         | 21 (13.4)    | 4 (11.8)                | 17 (13.8)             | 0.755   |
| Apixaban                                           | 59 (37.6)    | 13 (38.2)               | 46 (37.4)             | 0.929   |
| Ribaroxaban                                        | 26 (16.6)    | 6 (17.6)                | 20 (16.3)             | 0.847   |
| Edoxaban                                           | 8 (5.1)      | 0 (0.0)                 | 8 (6.5)               | 0.127   |

Data are presented as a number (percentage).

\*Statistically significant.
