# Supplementary figures and images for: Comparison of Rhythm and Rate Control Strategies for Stroke Occurrence in a Prospective Cohort of Atrial Fibrillation Patients
Source: PubMed Central journal article supplement — Yonsei Med J. 2017 Feb 5;59(2):258–64. doi: 10.3349/ymj.2018.59.2.258 (PMC5823828; doi:10.3349/ymj.2018.59.2.258), 2017-02-05

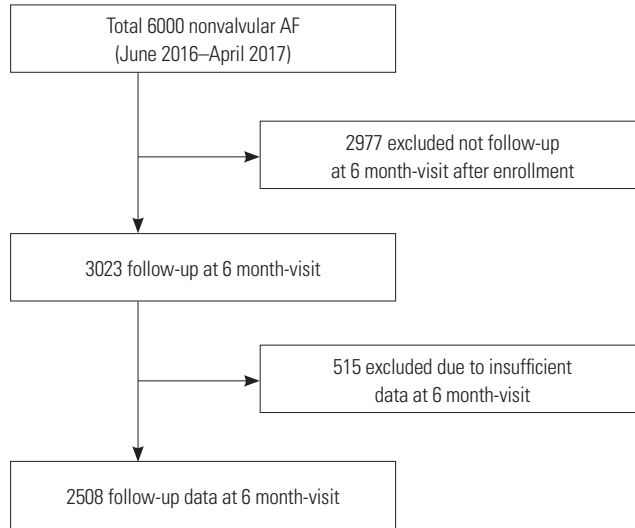

**Supplementary Fig. 1.** Study flow chart. AF, atrial fibrillation.

Supplement: ymj-59-258-s001.pdf [file ymj-59-258-s001.pdf]
